# Supplementary material
Source: PubMed Central journal article supplement (PMC7491366)

Patient ID number: \_\_\_\_\_

## HISTORY

Please specify the options that best describe your dog.

1. At what age was \_\_\_\_\_ diagnosed with \_\_\_\_\_?
2. Breed of your dog: \_\_\_\_\_
3. Hair length without grooming:     short (<1 inchs)     medium (1 -2 inchs)     long (> 2 inchs)
4. Nose length (see diagram page 4):  short     average     long
5. Body size:     Small <25lbs     Medium 25-50lbs     Large >50lbs
6. Reproductive status:     Intact     spayed/neutered

**For the rest of the survey, please think back to the period five years prior to your dog's diagnosis. Please select the options that best describe your pet.**

## GENERAL HEALTH

7. Was your dog fed a commercial pet food diet?  Yes     No     Other/Unknown

Please select all that apply:

- Dry:     None     partial     half     All  
Canned/moist food:  None     partial     half     All  
Table scraps:     None     Occasional     Frequent

8. Were flea products used on the dog?  Yes     No     Unknown

If yes:

Please select all that apply:

- Collar     Skin application/drops     Oral med/pills  
 Powder/spray     Shampoo     Dip

Which of the following flea brands was most used:

- Frontline     Advantage     Advantix     Comfortis  
 Sentinel     Revolution     Other     Unknown

9. Please identify how often the dog was bathed:

- Twice a month     Once a month     Less than once a month

10. Please identify how often the dog's teeth were brushed:

- Never     Once a year     Twice a year     Once every 2-3 months     at least once a month

Patient ID number: \_\_\_\_\_

11. At the time of diagnosis, had your dog been vaccinated for the following at least once within the previous three years:

- |                           |                              |                             |                                  |
|---------------------------|------------------------------|-----------------------------|----------------------------------|
| Rabies:                   | <input type="checkbox"/> Yes | <input type="checkbox"/> No | <input type="checkbox"/> Unknown |
| Distemper/hepatitis/parvo | <input type="checkbox"/> Yes | <input type="checkbox"/> No | <input type="checkbox"/> Unknown |
| Bordetella:               | <input type="checkbox"/> Yes | <input type="checkbox"/> No | <input type="checkbox"/> Unknown |

12. Did your dog have any of the following ever during the 5 year period?

- |                       |                              |                             |                                  |
|-----------------------|------------------------------|-----------------------------|----------------------------------|
| Pneumonia:            | <input type="checkbox"/> Yes | <input type="checkbox"/> No | <input type="checkbox"/> Unknown |
| Kennel cough:         | <input type="checkbox"/> Yes | <input type="checkbox"/> No | <input type="checkbox"/> Unknown |
| Wheezing:             | <input type="checkbox"/> Yes | <input type="checkbox"/> No | <input type="checkbox"/> Unknown |
| Difficulty breathing: | <input type="checkbox"/> Yes | <input type="checkbox"/> No | <input type="checkbox"/> Unknown |

13. Approximately how many hours per day (24 hr period) was your dog inside your home? \_\_\_\_\_

### ENVIRONMENT

14. Which of the following best describe the location of the house or apartment:

- Suburban       Urban       Rural       Farm       Other: \_\_\_\_\_

15. What was the county in which the house or apartment was located? \_\_\_\_\_  Unknown

16. Were any of the following in the house or apartment:

- Lead paint       Radon       Asbestos       Mold       Unknown

17. Which fuel was used most for heating the house or apartment in which your dog lived for the 5 years prior to diagnosis?

- Gas from underground pipes serving the neighborhood
- Gas: bottled, tank, or LP
- Electricity
- Fuel oil, kerosene, etc.
- Coal or coke
- Wood
- Solar Energy
- Other fuel
- No fuel used

18. Which was the source of heating the house or apartment?

- Central       Fireplace(wood burning)       Floor/Gas Unit       Other \_\_\_\_\_

19. Which was used most for cooling the house or apartment?

- Central       Fans       Air conditioner       Other: \_\_\_\_\_

20. Not counting decks, porches, or garages how many rooms were in the house or apartment:

21. Are there any industrial companies near (within 5 miles) to your home?      Yes      No      Unknown

Patient ID number: \_\_\_\_\_

22. Any garbage waste disposal centers near your home? Yes No Unknown

23. Any hazardous waste disposal centers near your home? Yes No Unknown

24. Were you or any other people in your home smokers (defined as smoking at least once per day most days of the week) during any part of the five years to the pet's diagnosis?  Yes  No

25. On average, about how many days per week was there smoking inside the home"? \_\_\_\_\_

26. Not counting decks, porches, or garages, was smoking allowed inside the home:

- Always allowed
- Allowed only at some times or in some places
- Never allowed

27. Please identify the following:

Number of smokers living in the house:  1  2  ≥3

Considering all the smokers whom have spent time in the household, please specify the following:

1. Types of tobacco products used: check all that apply

Cigarettes  cigars  pipe

2. Number of cigarettes smoked per 24hrs:  0  1-19  ≥20

4. Number of cigarettes smoked inside the home per 24hrs:  0  1-19  ≥20

5. In general, how far would your dog be from those smoking inside the home?

Lap  Next to  Same room  Not present  Unknown

#### EXPOSURE TO HOUSEHOLD PRODUCTS:

28. Was the pet exposed to any of the following five years prior to diagnosis:

**Incense/Candles**  Never  Once  Occasionally (2-10 times/year)  Frequently (> 10 times/year)

**Bathroom aerosols**  Never  Once  Occasionally (2-10 times/year)  Frequently (> 10 times/year)

**Cleaning aerosols**  Never  Once  Occasionally (2-10 times/year)  Frequently (> 10 times/year)

**Herbicides**  Never  Once  Occasionally (2-10 times/year)  Frequently (> 10 times/year)

**Pesticides**  Never  Once  Occasionally (2-10 times/year)  Frequently (> 10 times/year)

**Fertilizers**  Never  Once  Occasionally (2-10 times/year)  Frequently (> 10 times/year)

**Wood shavings**  Never  Once  Occasionally (2-10 times/year)  Frequently (> 10 times/year)

Thank you for your participation in this study!

Patient ID number: \_\_\_\_\_

Short

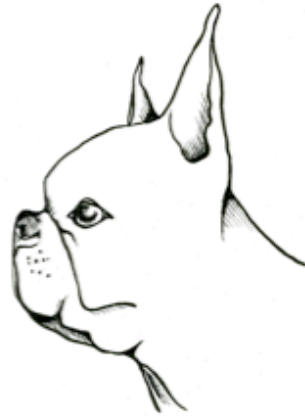

Average

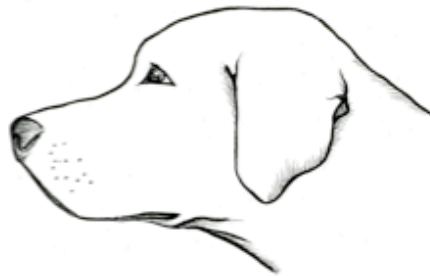

Long

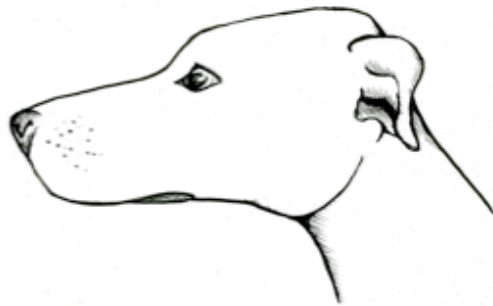

Supplement: NIHMS1626151-supplement-Supplementary_Survey.pdf [file NIHMS1626151-supplement-Supplementary_Survey.pdf]
